# Supplementary material
Source: PubMed Central journal article supplement (PMC3537780)

**Appendix 1 (as supplied by authors): Core biopsy specimen of the patient's right kidney showing several eosinophils, suggesting an allergic cause. Hematoxylin and eosin stain (400× magnification).**

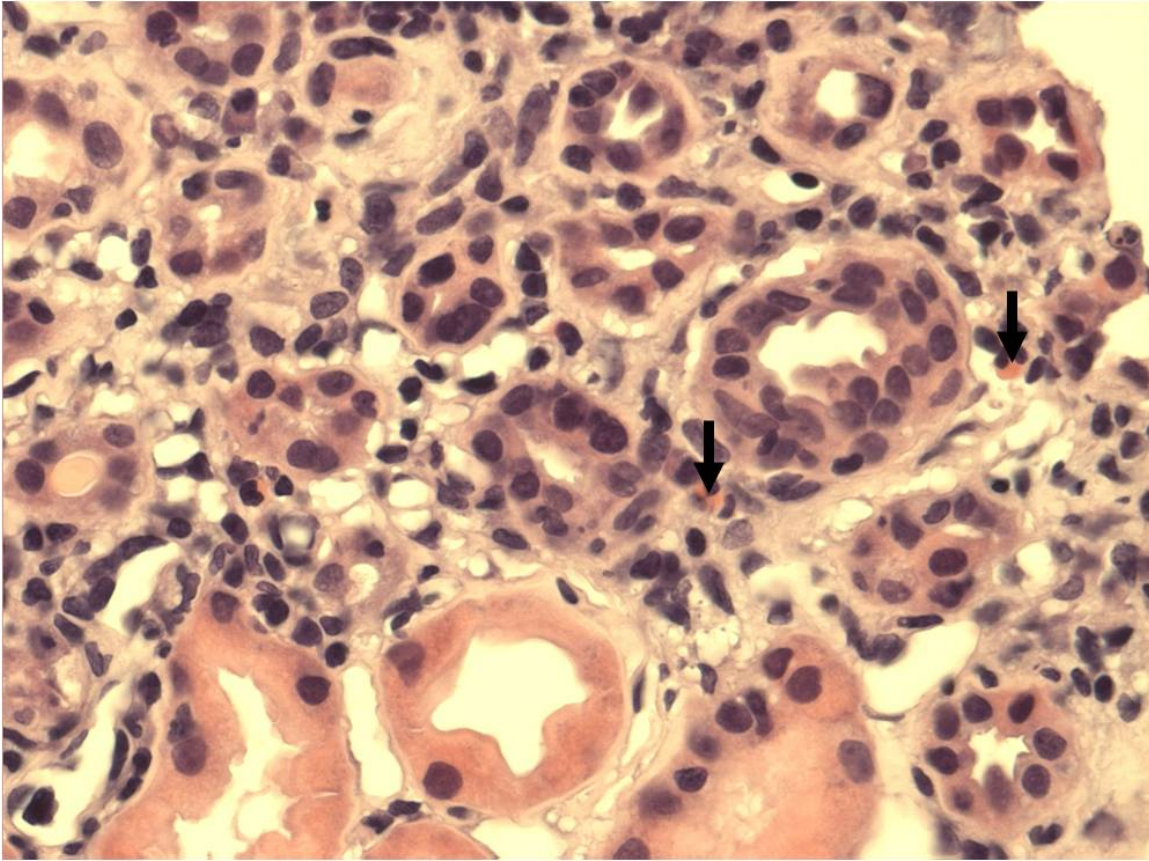

Supplement: supp_120954_case-klassen-1-at.pdf [file supp_120954_case-klassen-1-at.pdf]
